# Supplementary material for: Colonoscopic Withdrawal Times and Adenoma Detection during Screening Colonoscopy
Source: Atypon-hosted journal article supplement (doi:10.1056/nejmoa055498), 2006-12-13

## Supplementary Appendix

This appendix has been provided by the authors to give readers additional information about their work.

Supplement to: Barclay RL, Vicari JJ, Doughty AS, Johanson JF, Greenlaw RL. Colonoscopic withdrawal times and adenoma detection during screening colonoscopy. *N Engl J Med* 2006;355:2533-41.

# Physician A

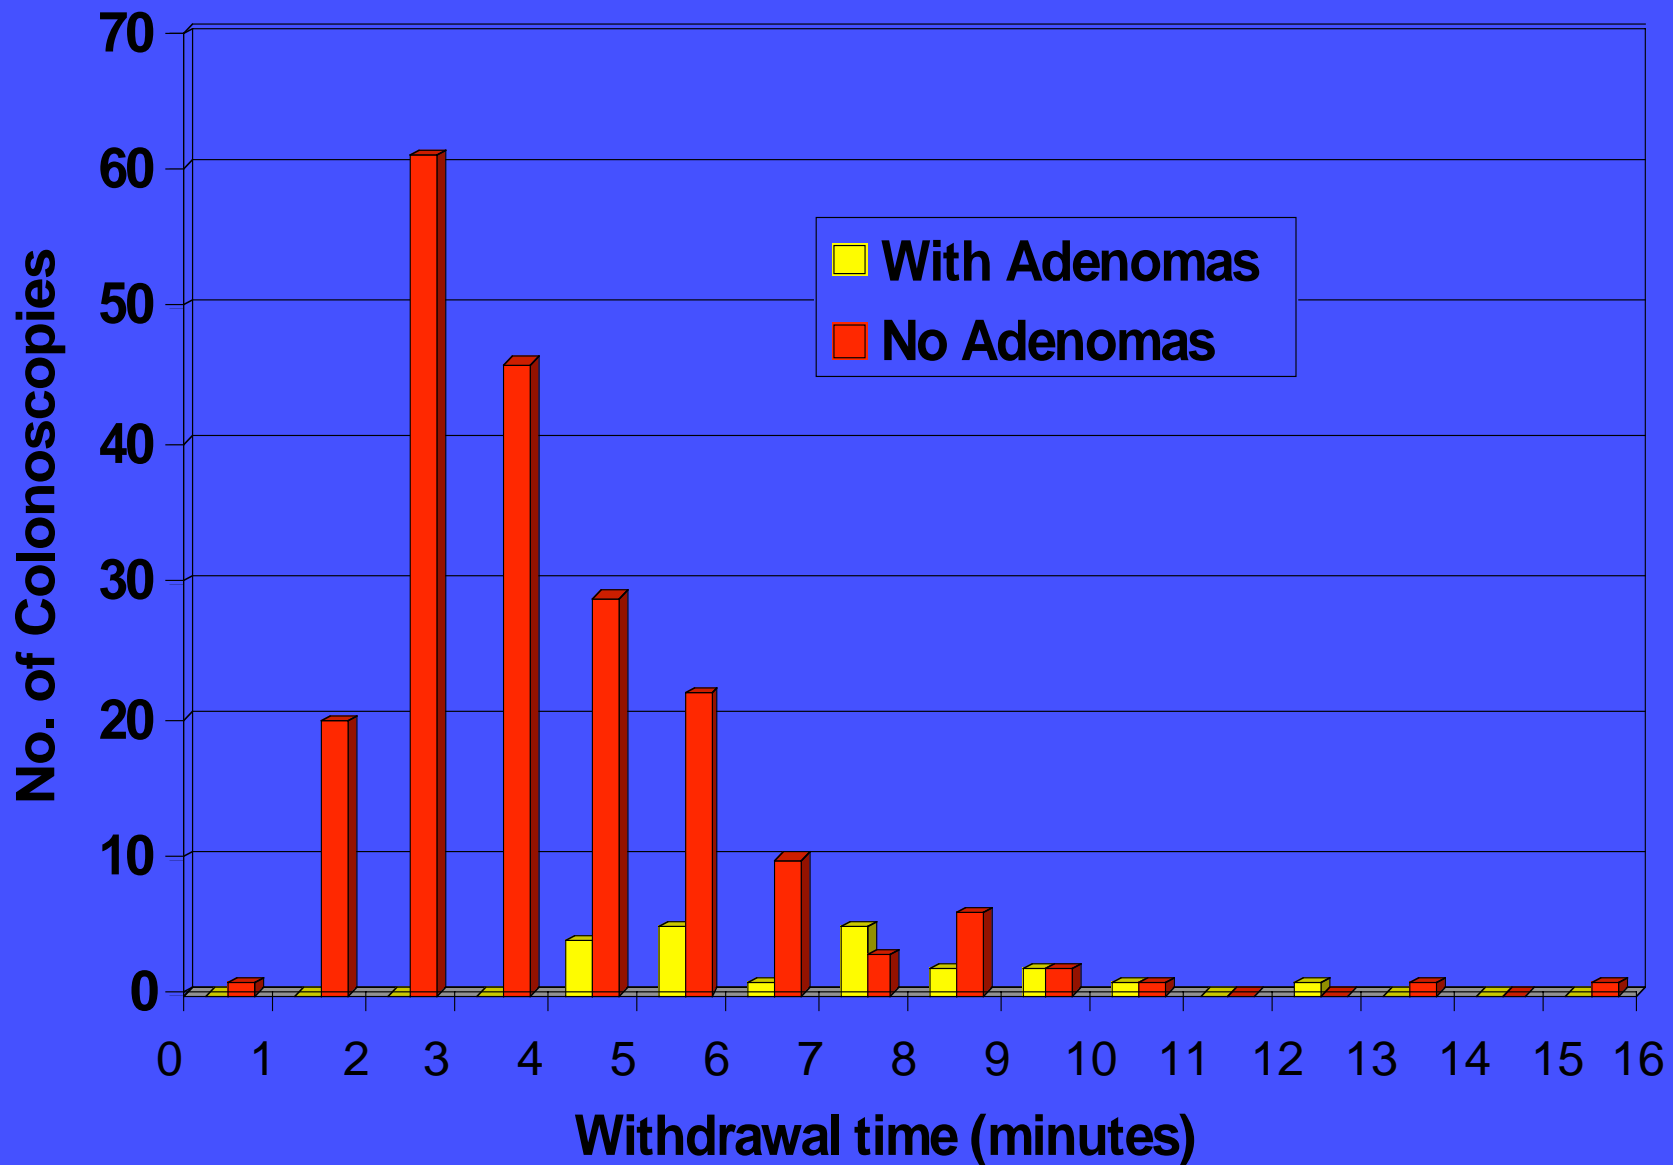

# Physician B

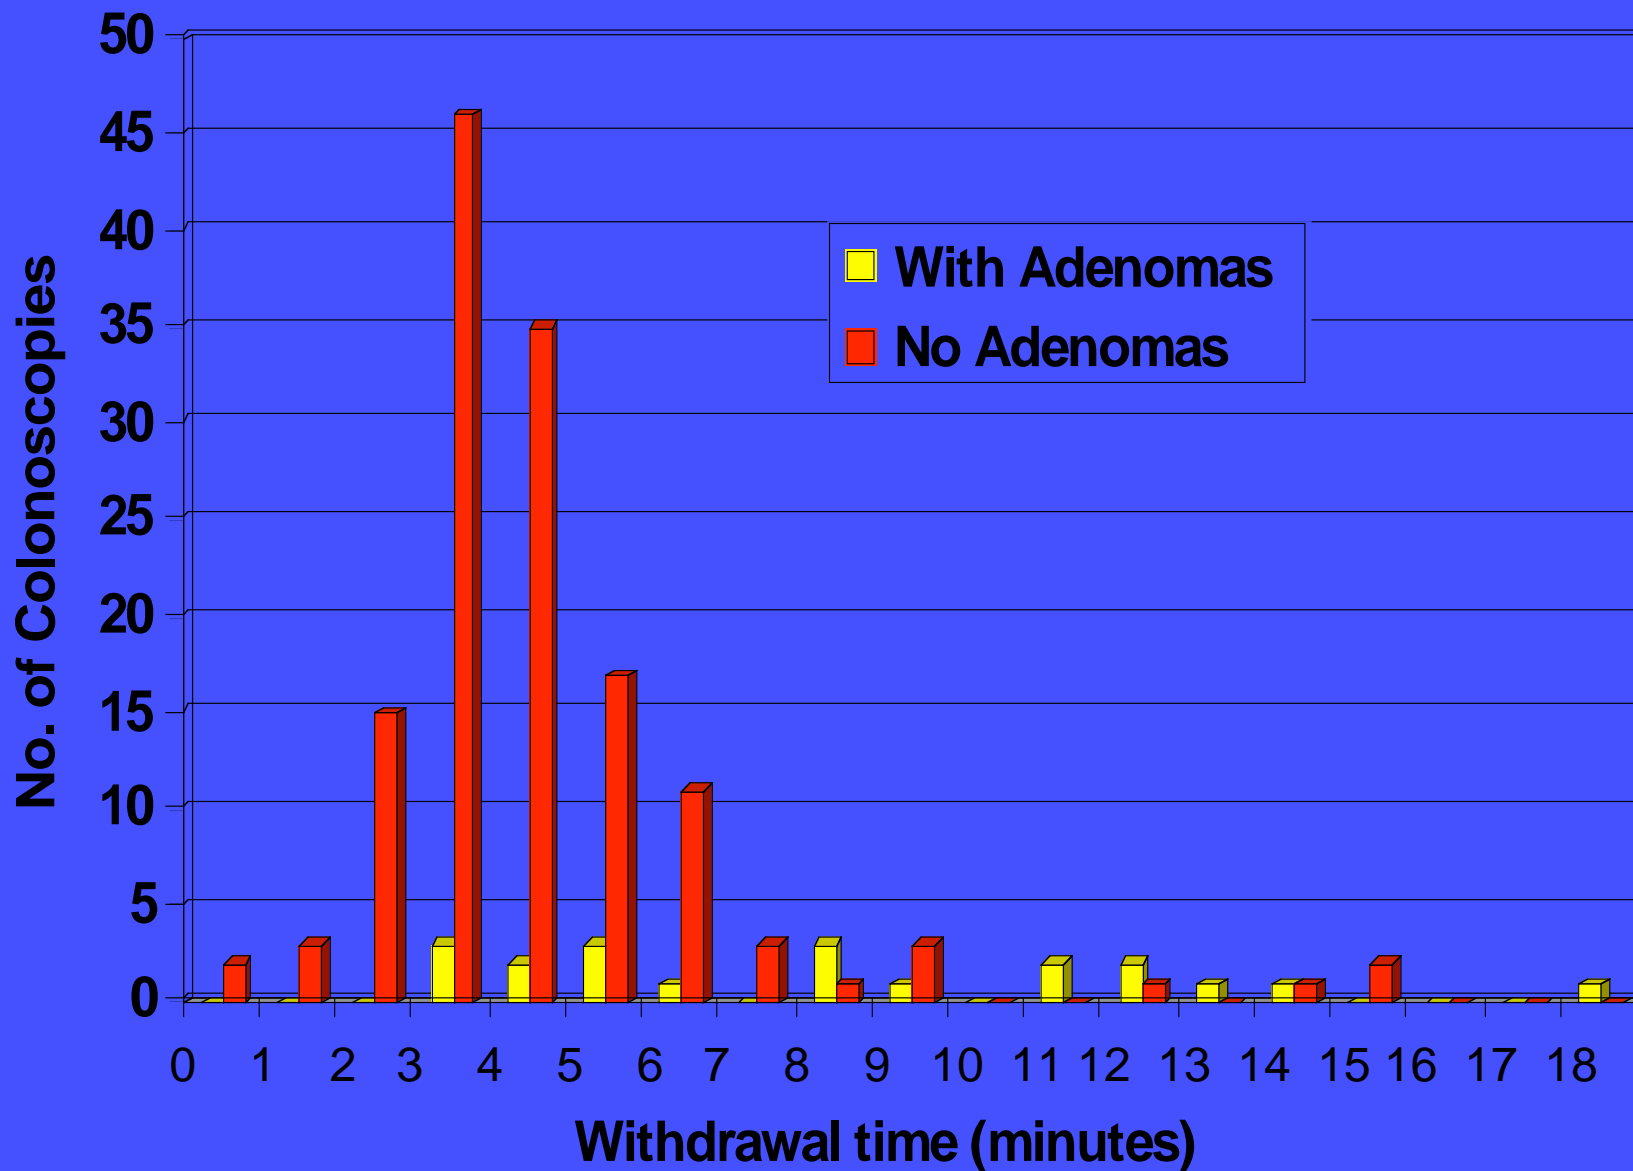

# Physician C

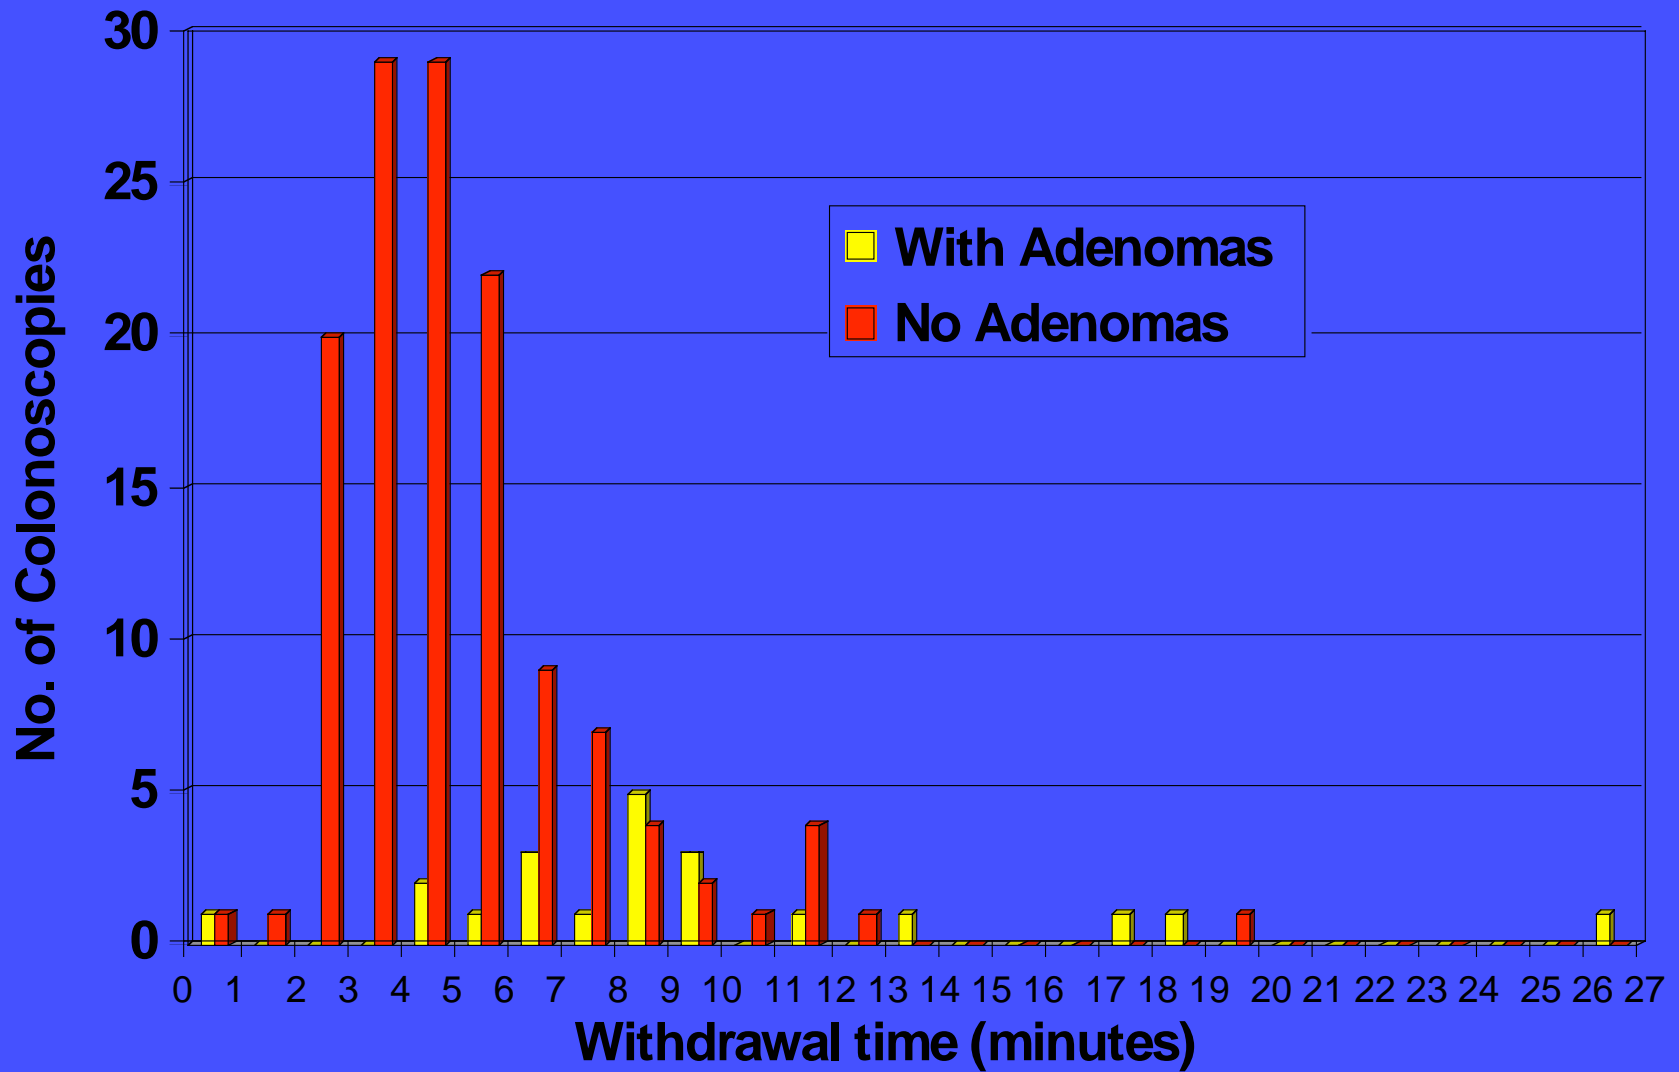

# Physician H

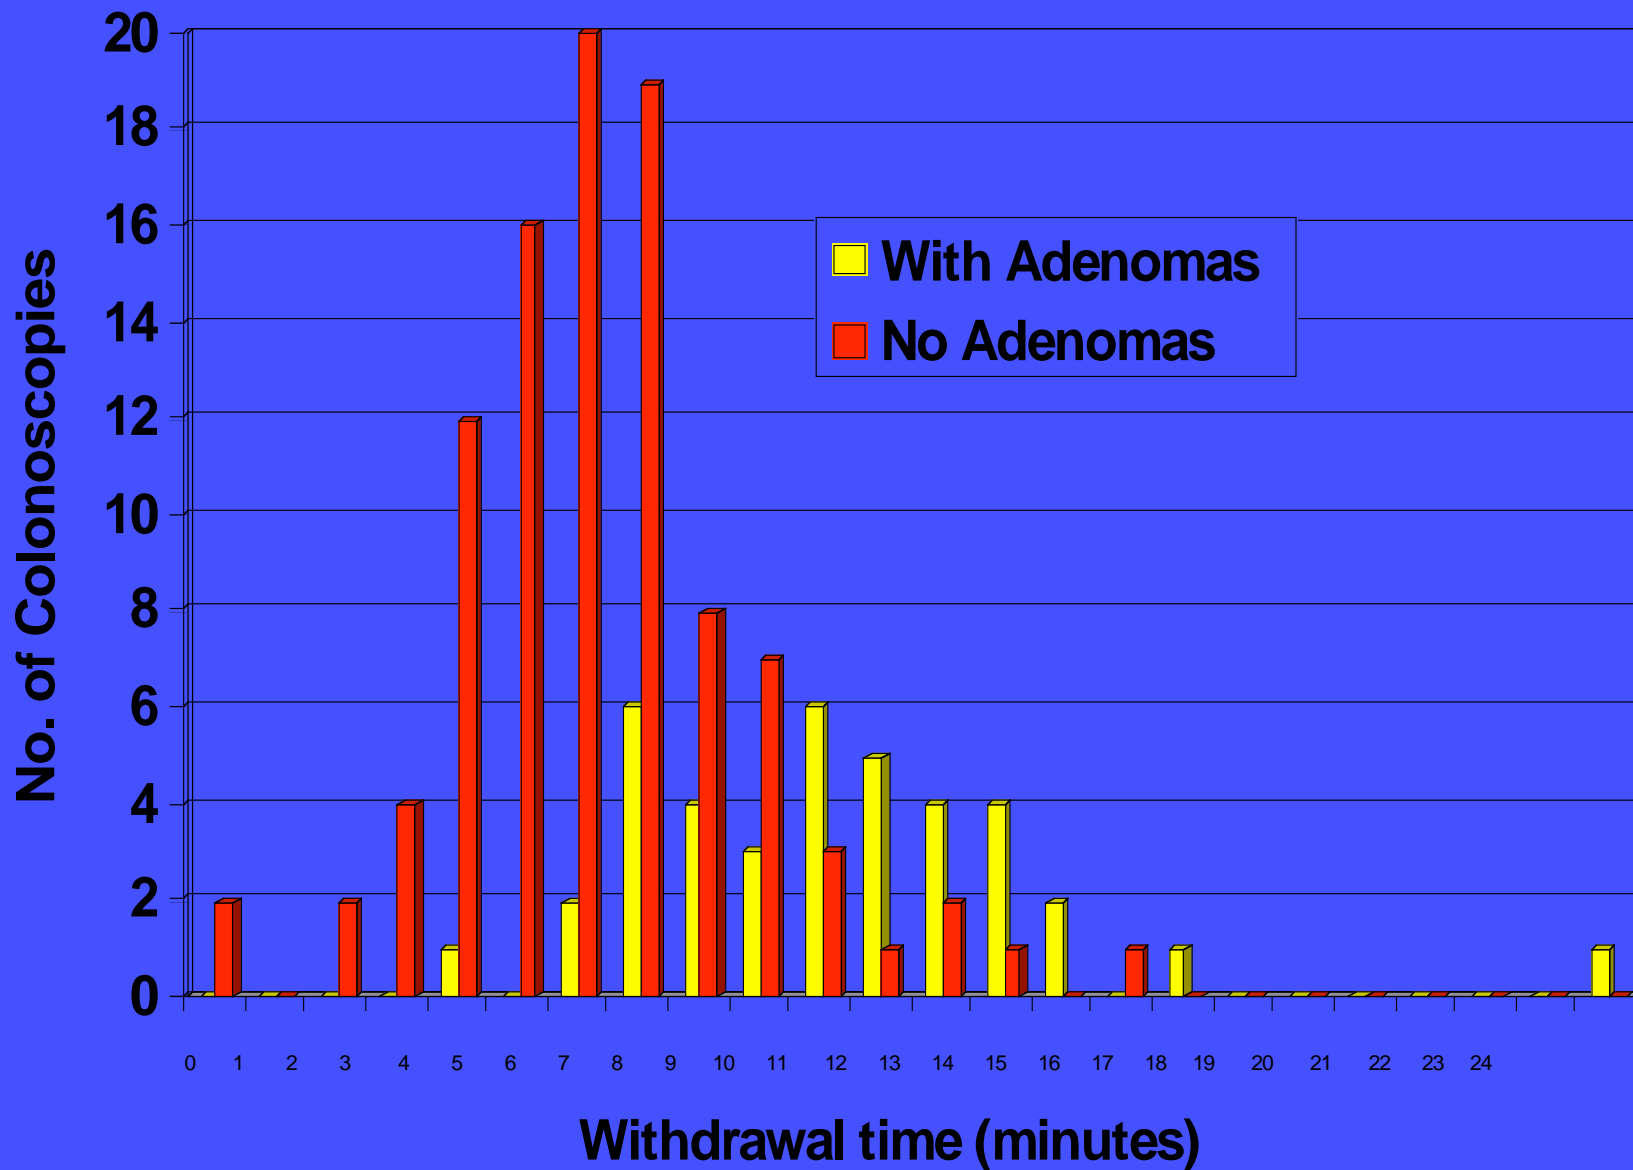

# Physician F

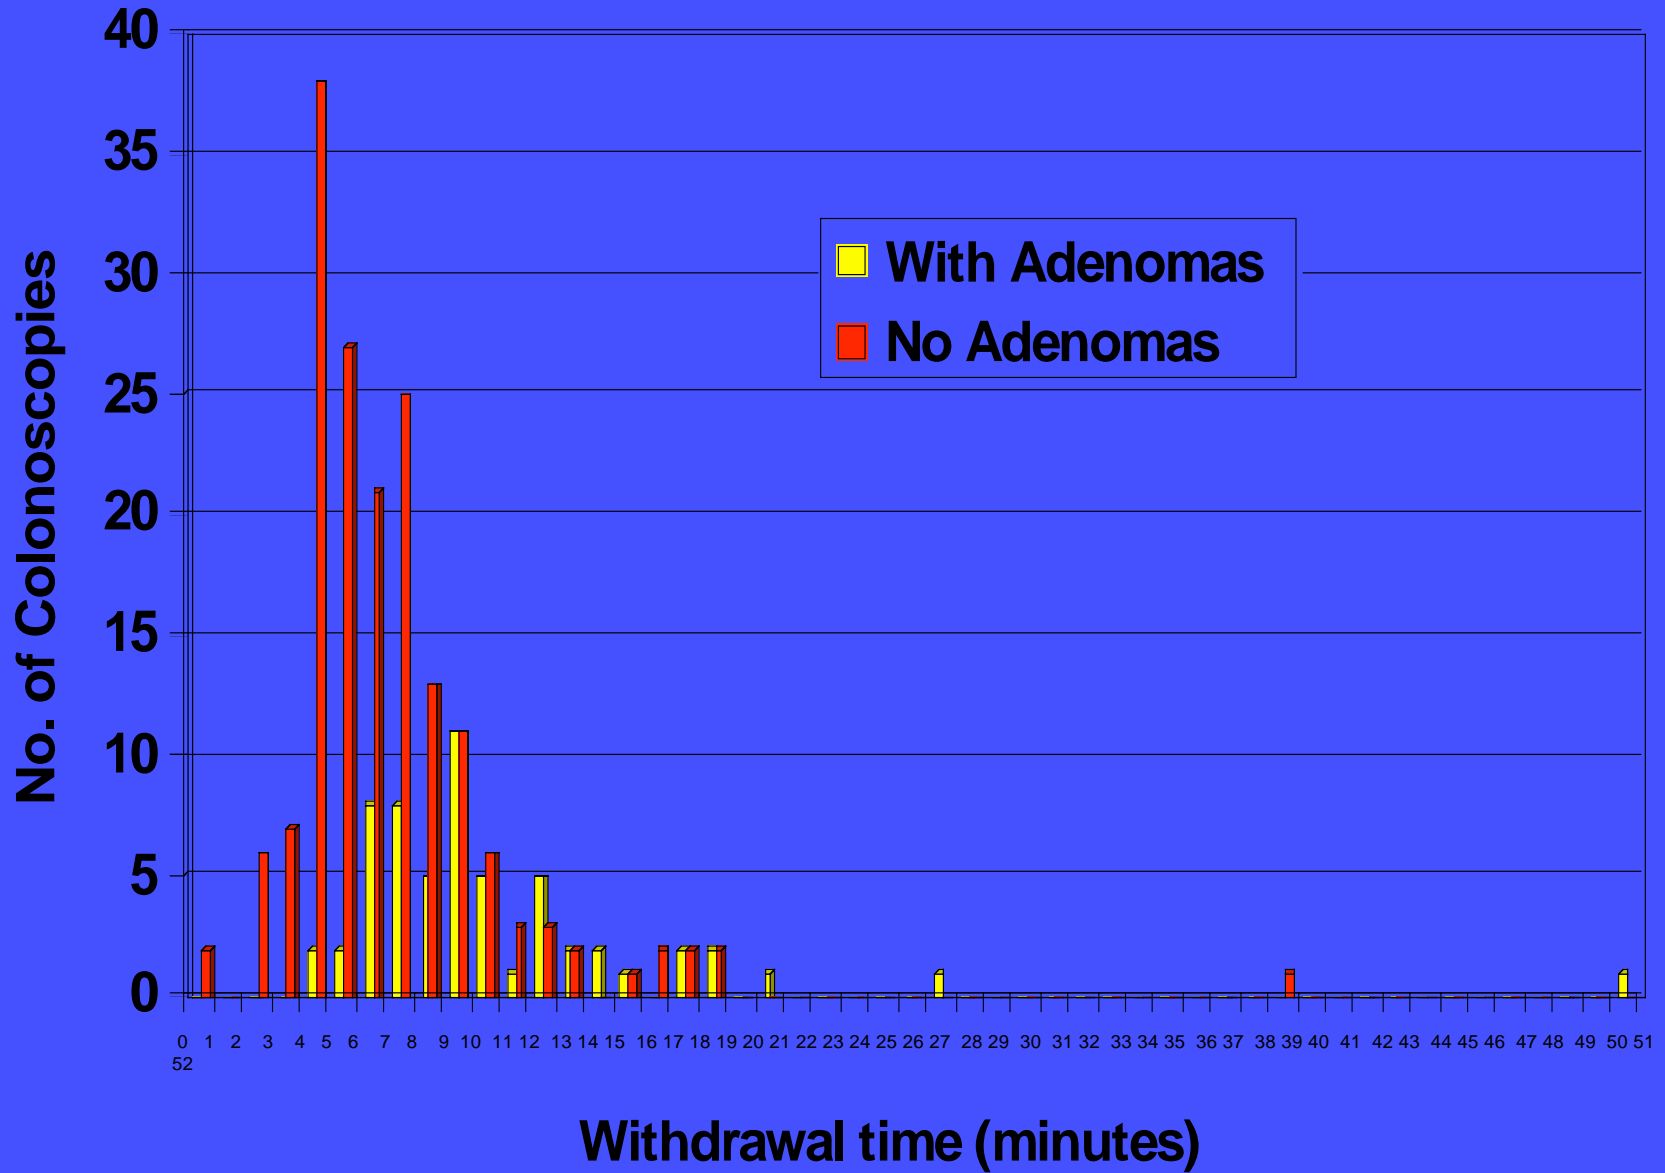

# Physician D

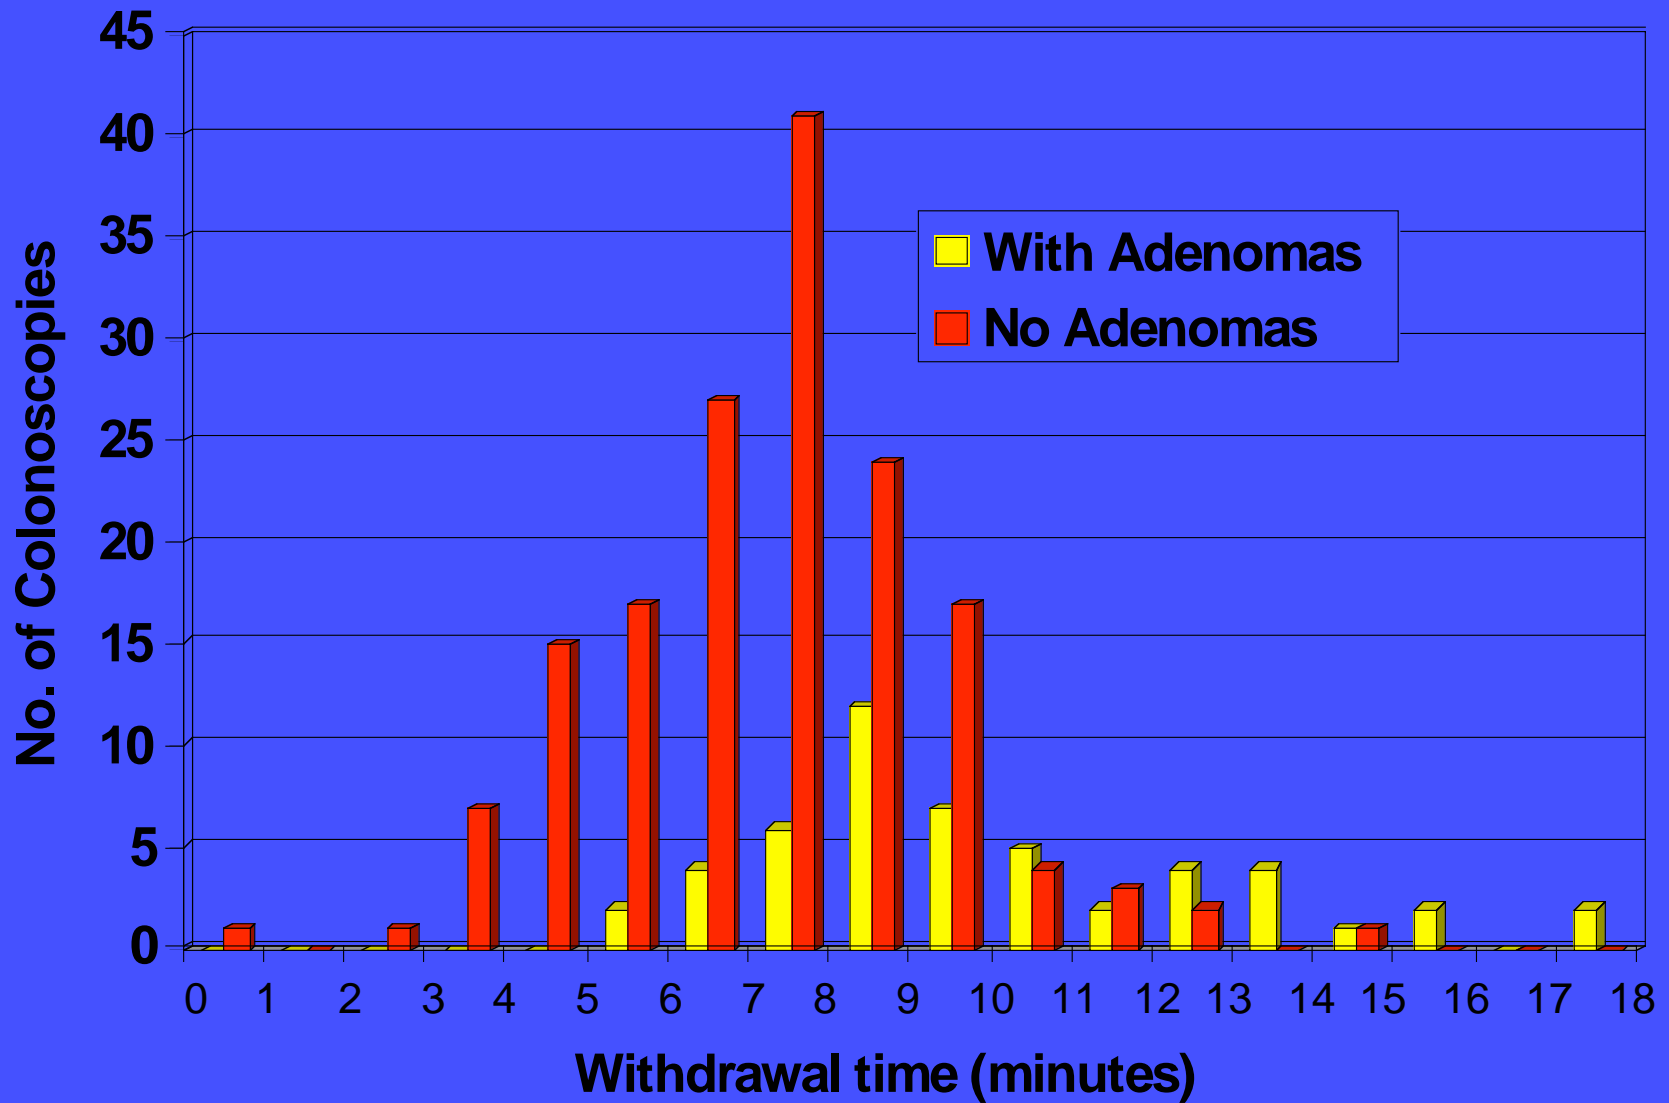

# Physician I

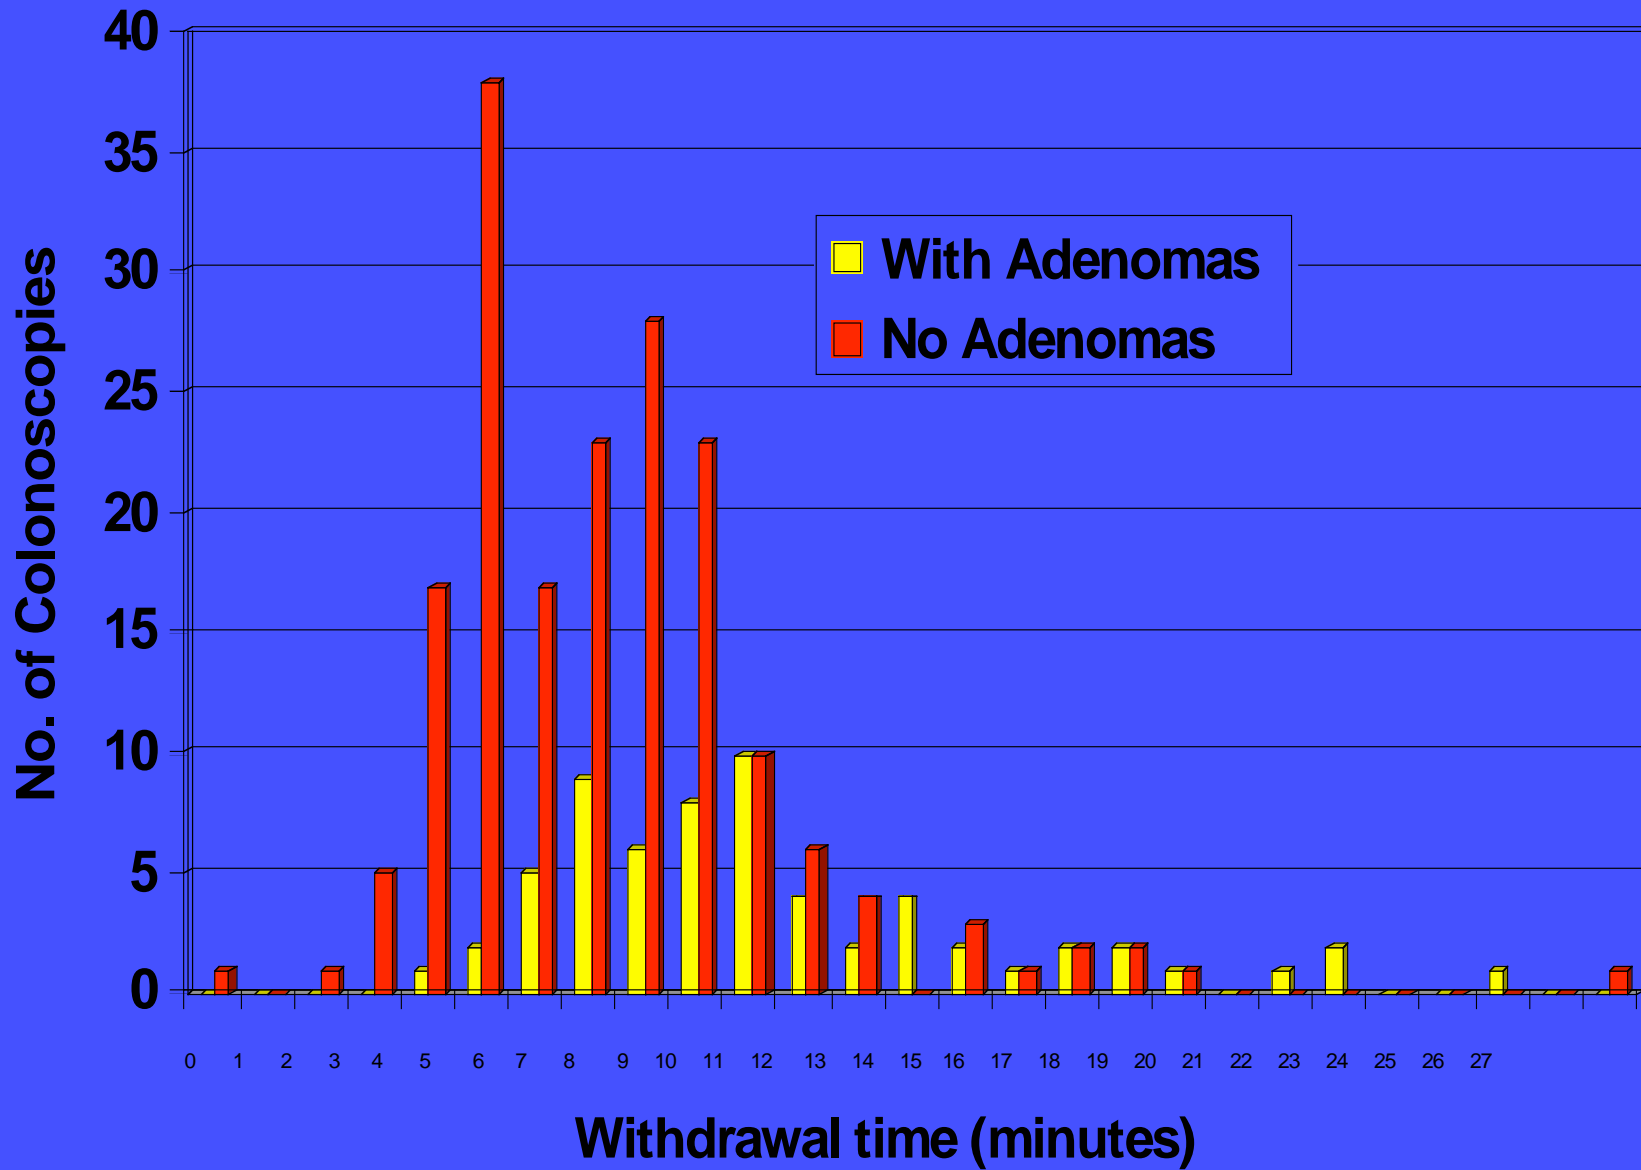

# Physician E

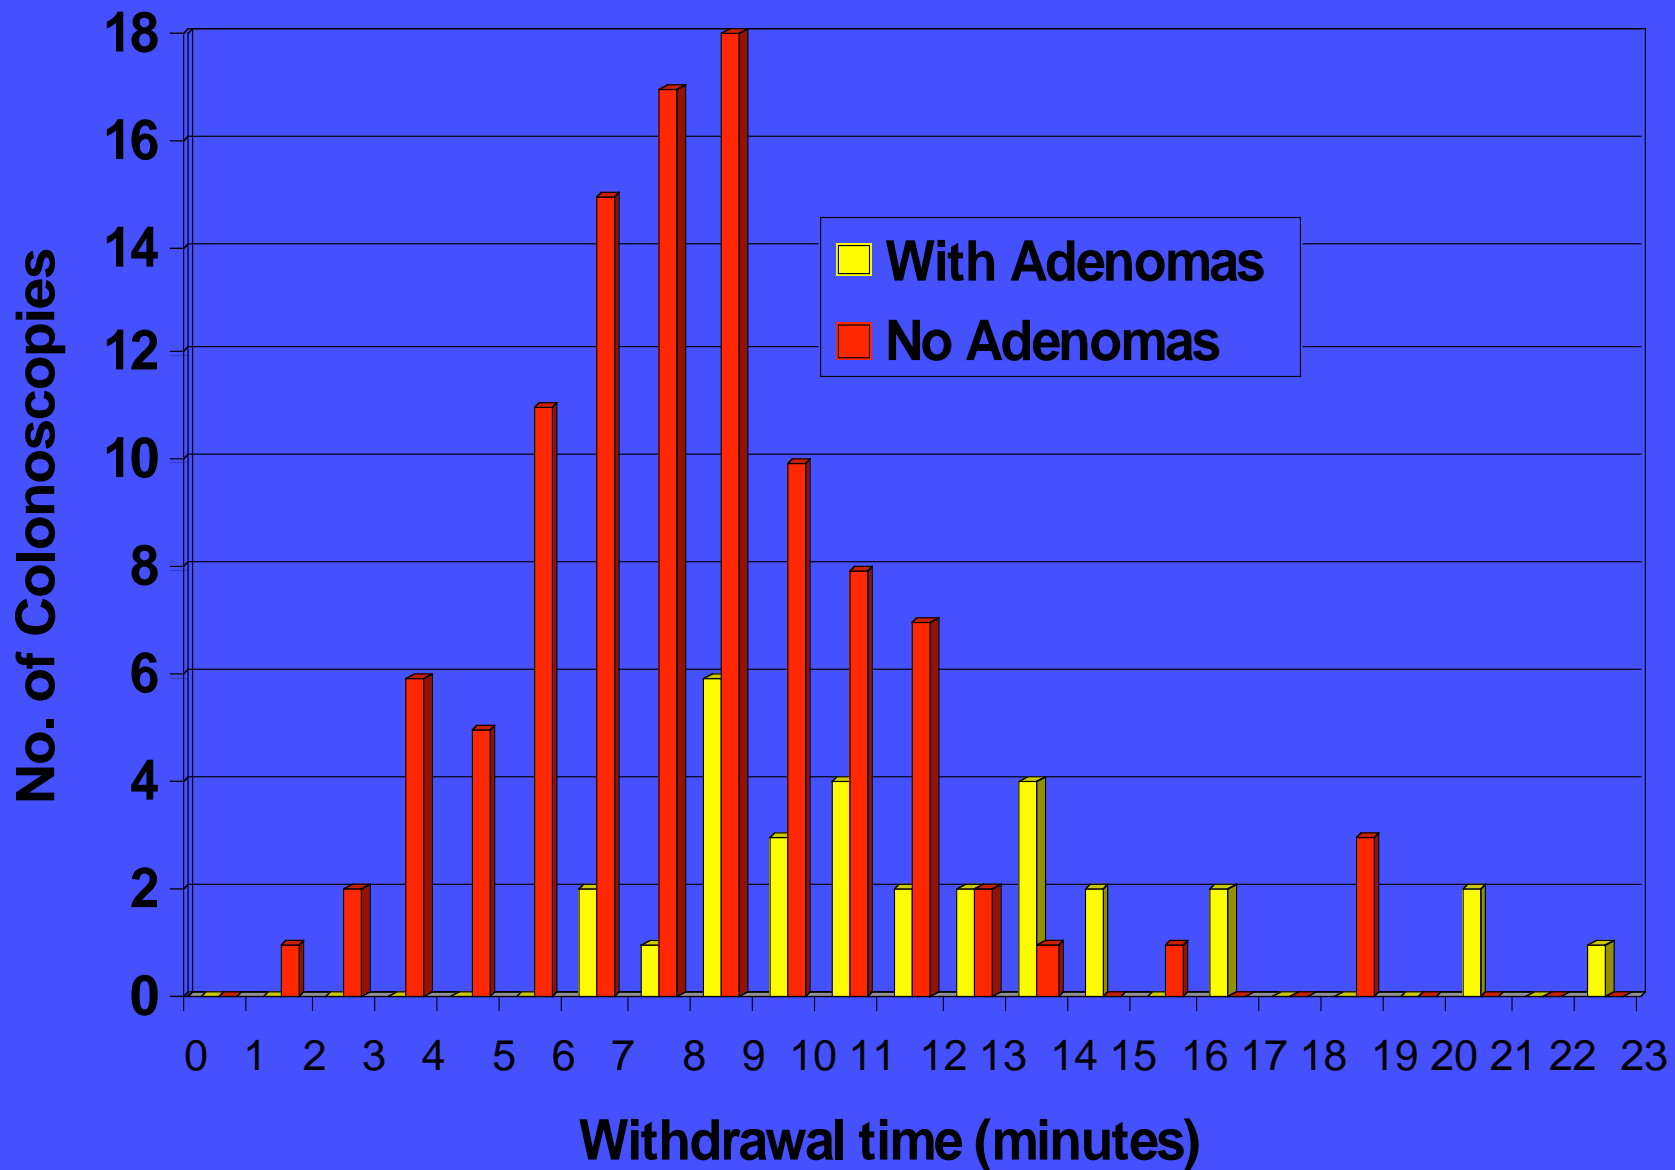

# Physician G

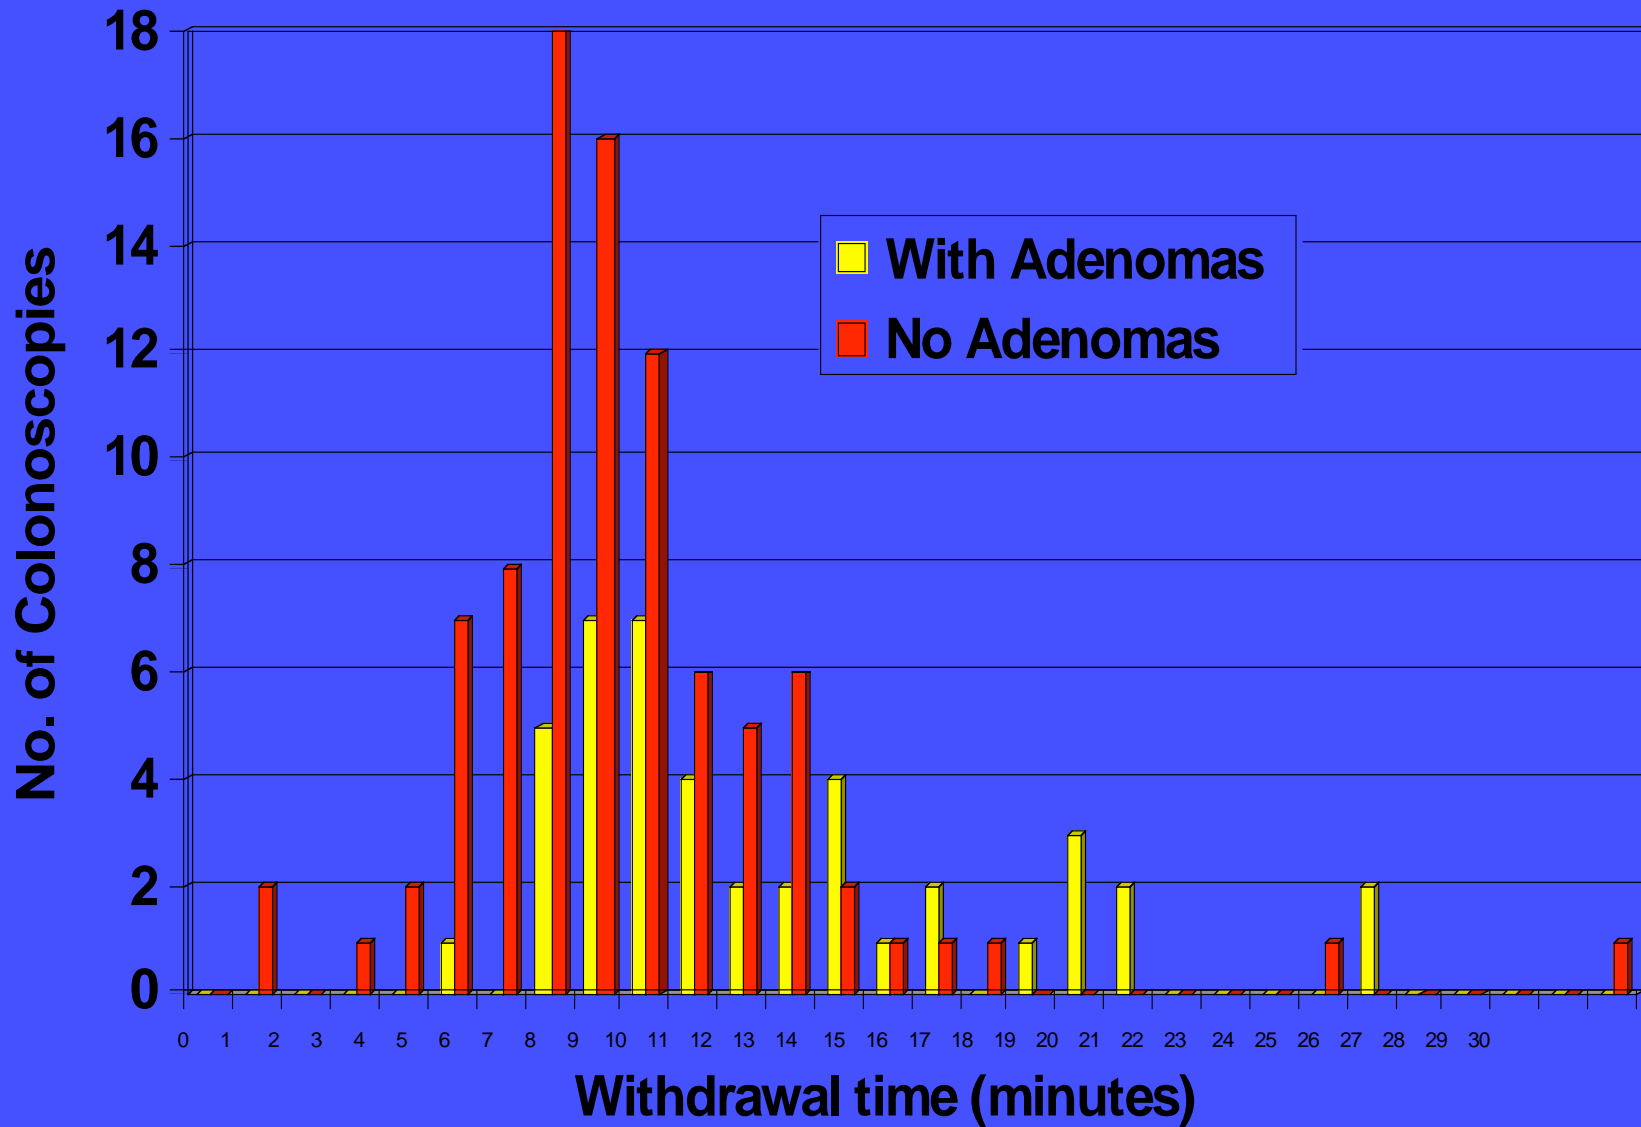

# Physician J

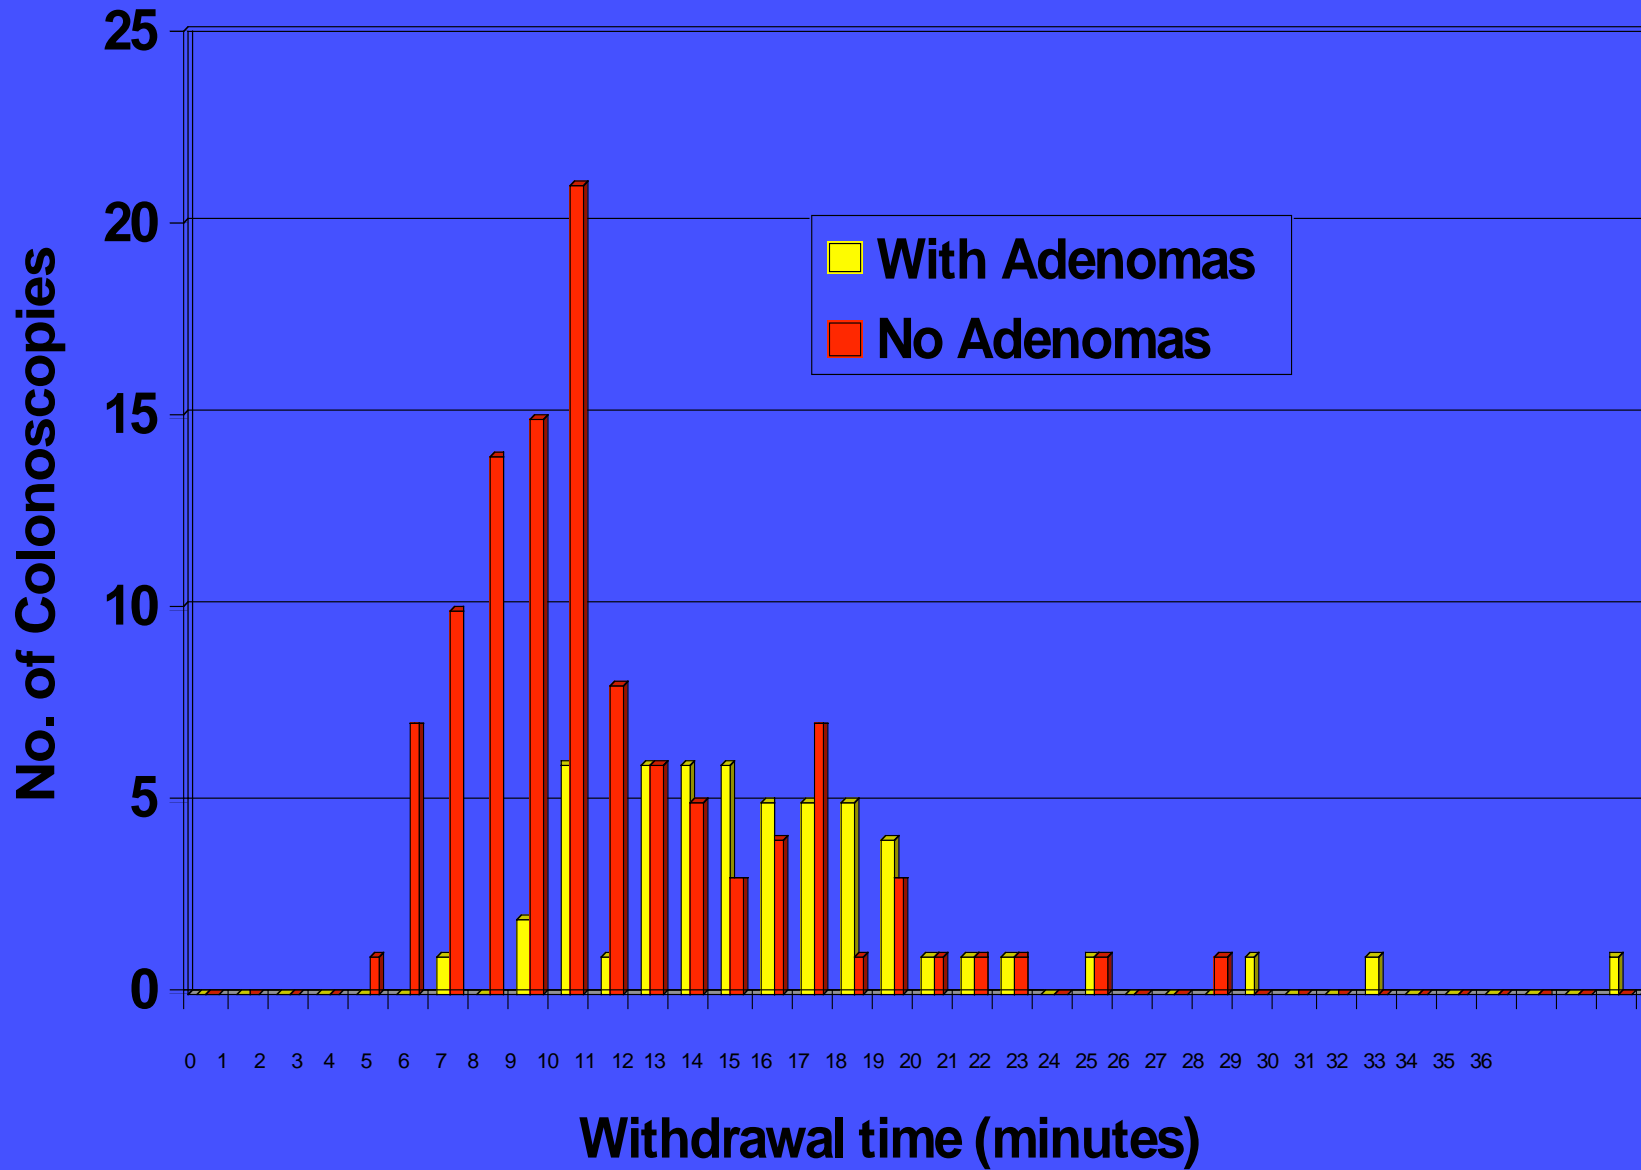

# Physician K

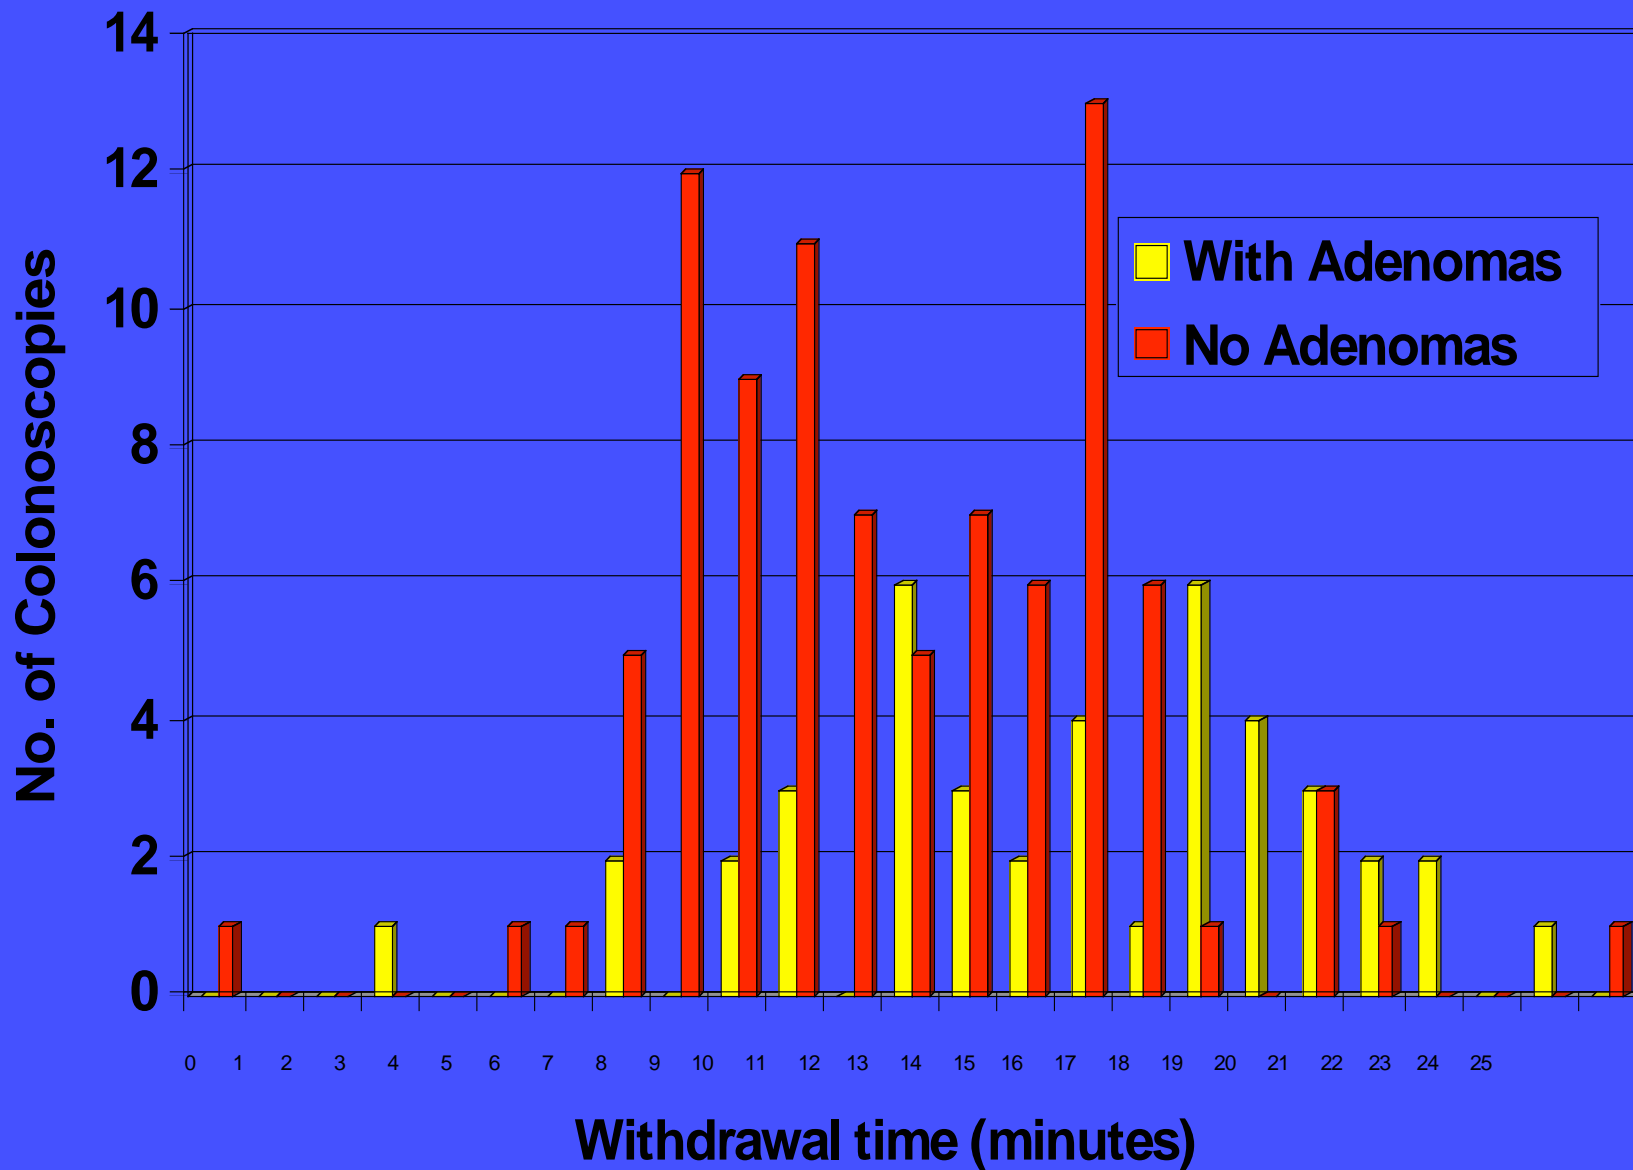

# Physician L

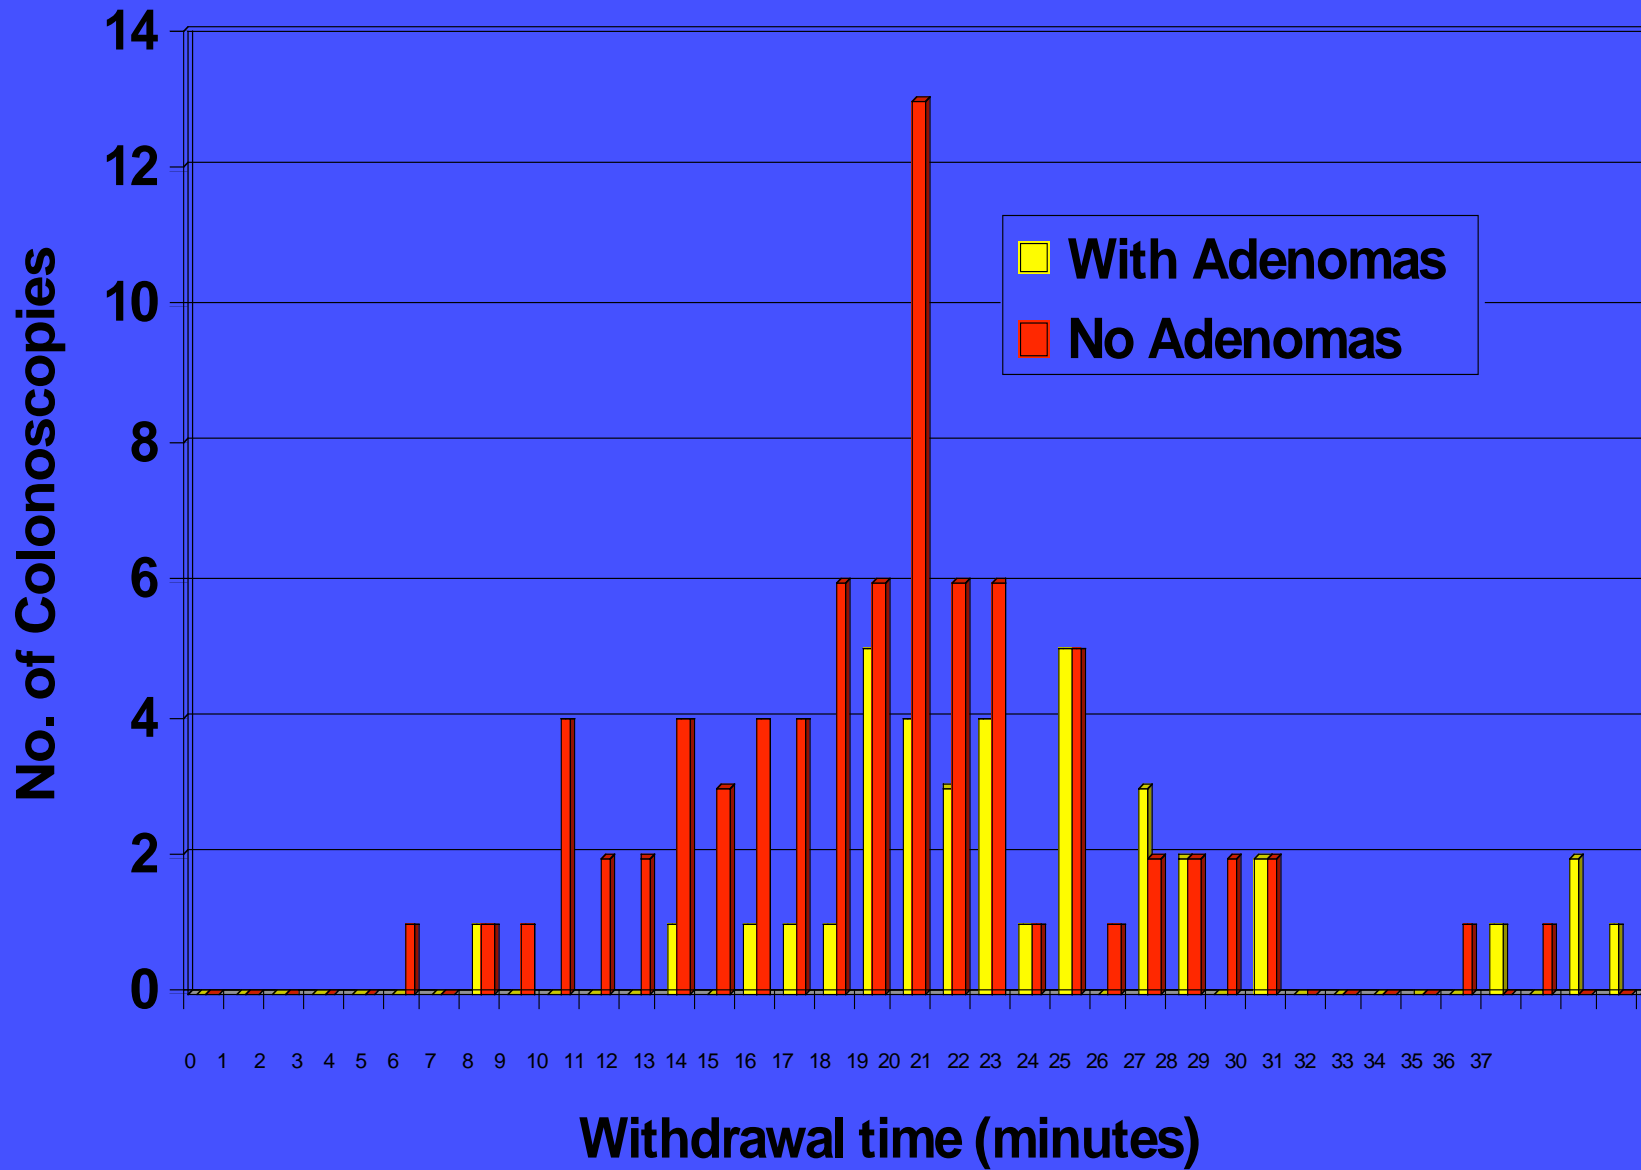

Supplement: nejm_barclay_2533sa1.pdf [file nejm_barclay_2533sa1.pdf]
